# Supplementary material
Source: PubMed Central journal article supplement (PMC3655122)

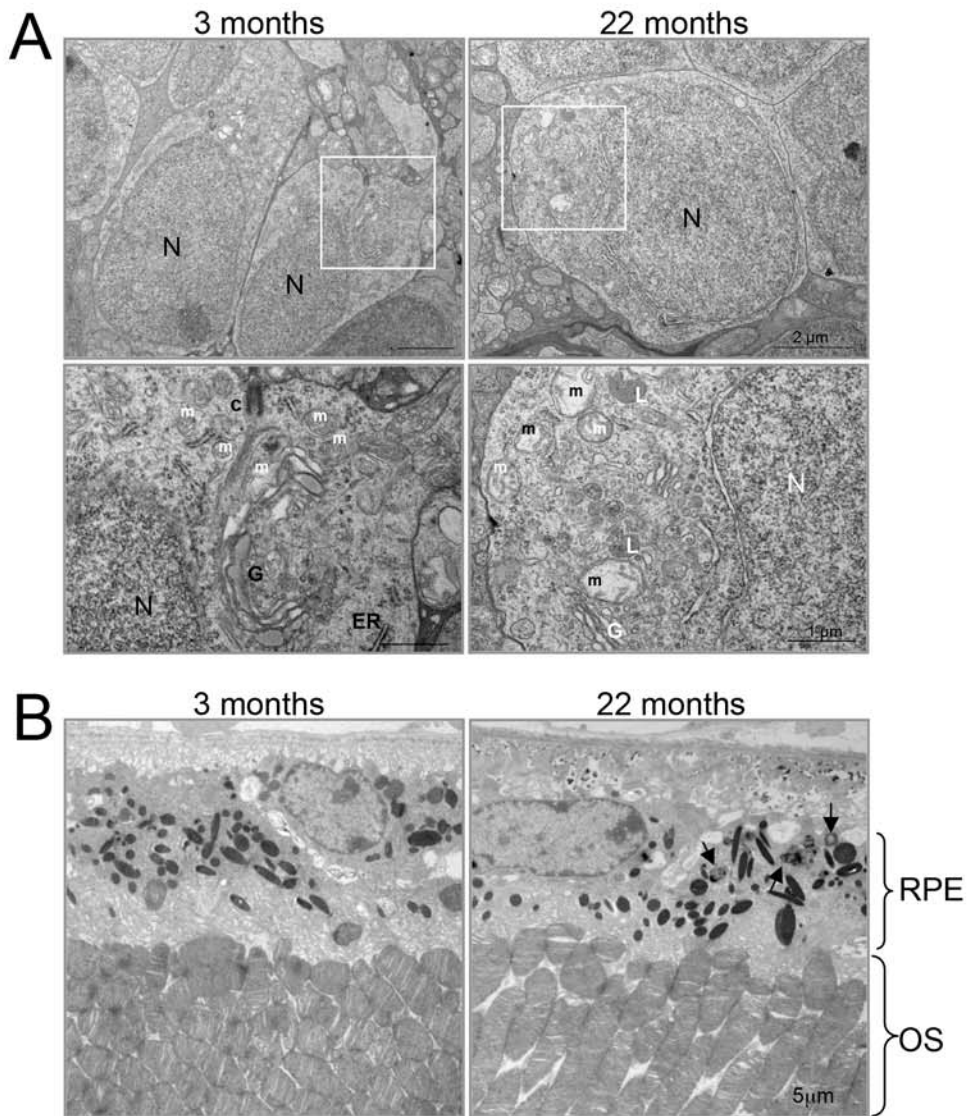

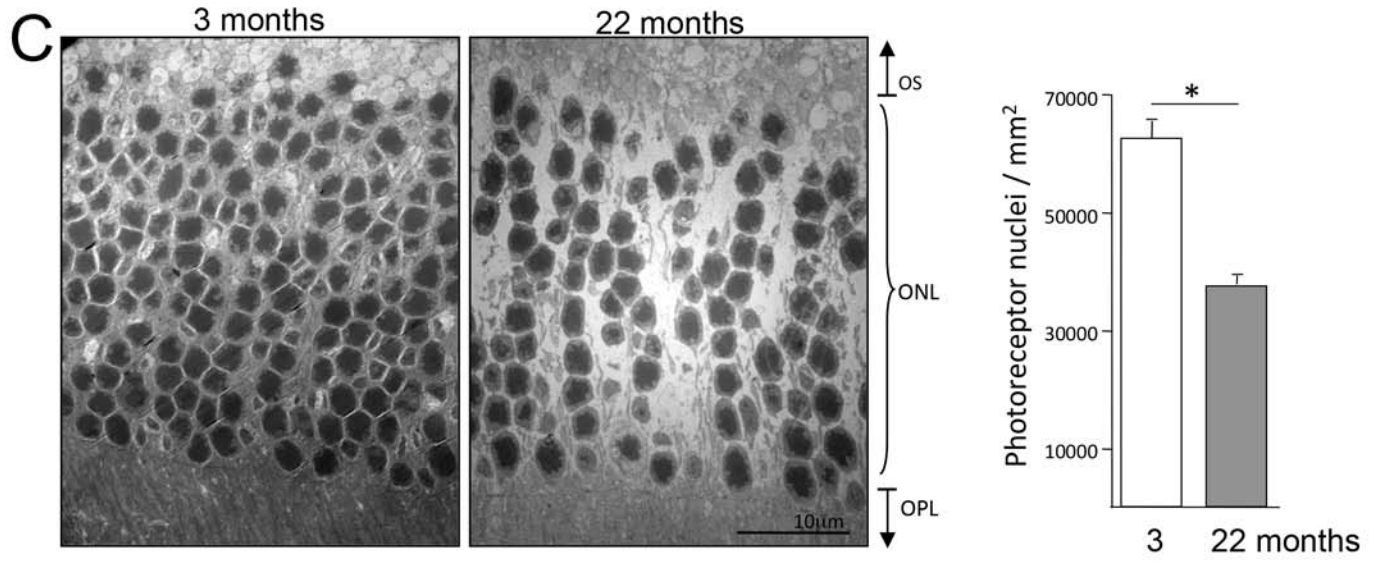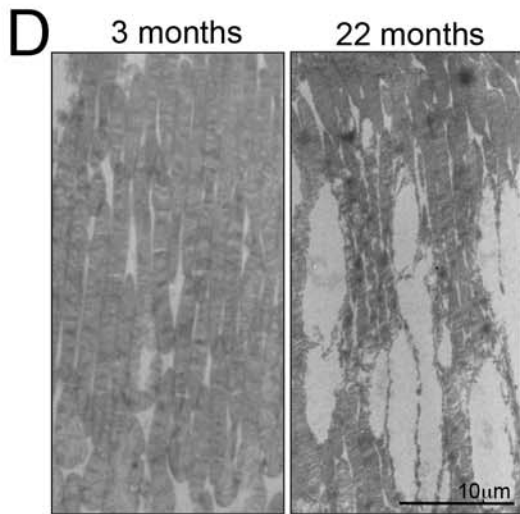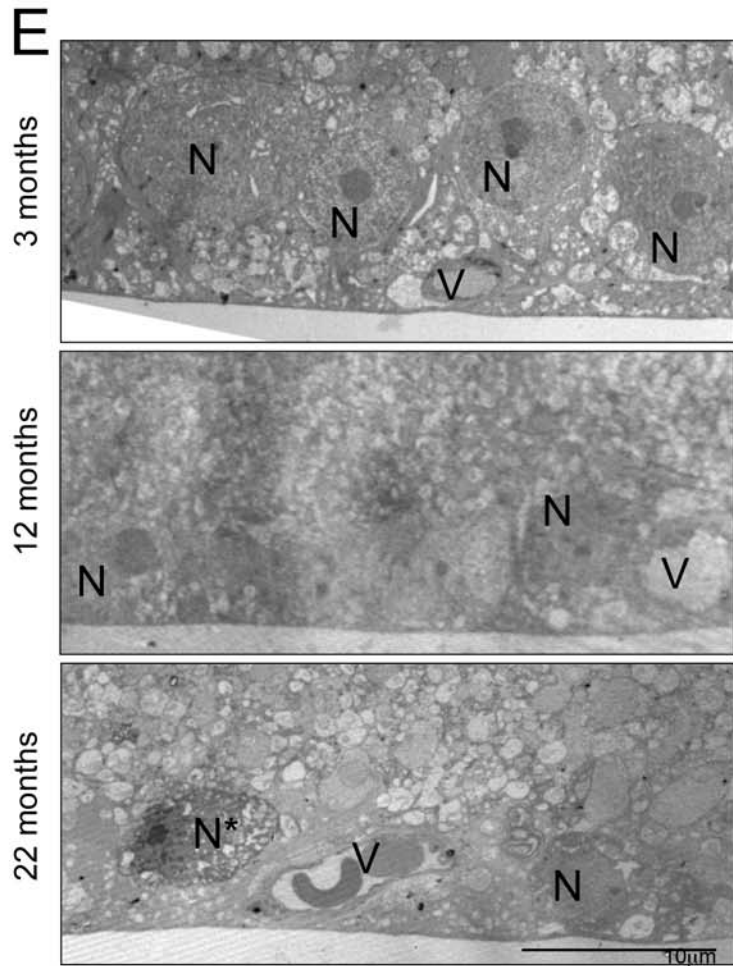

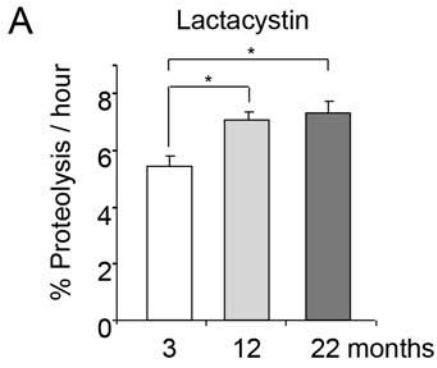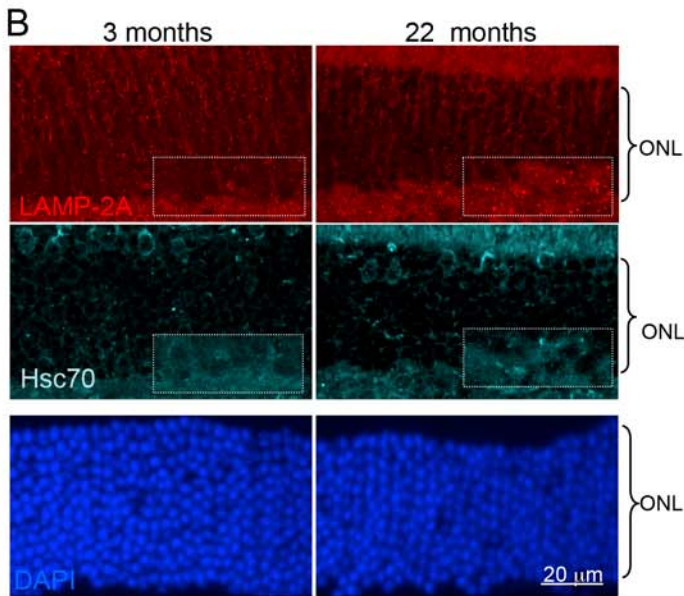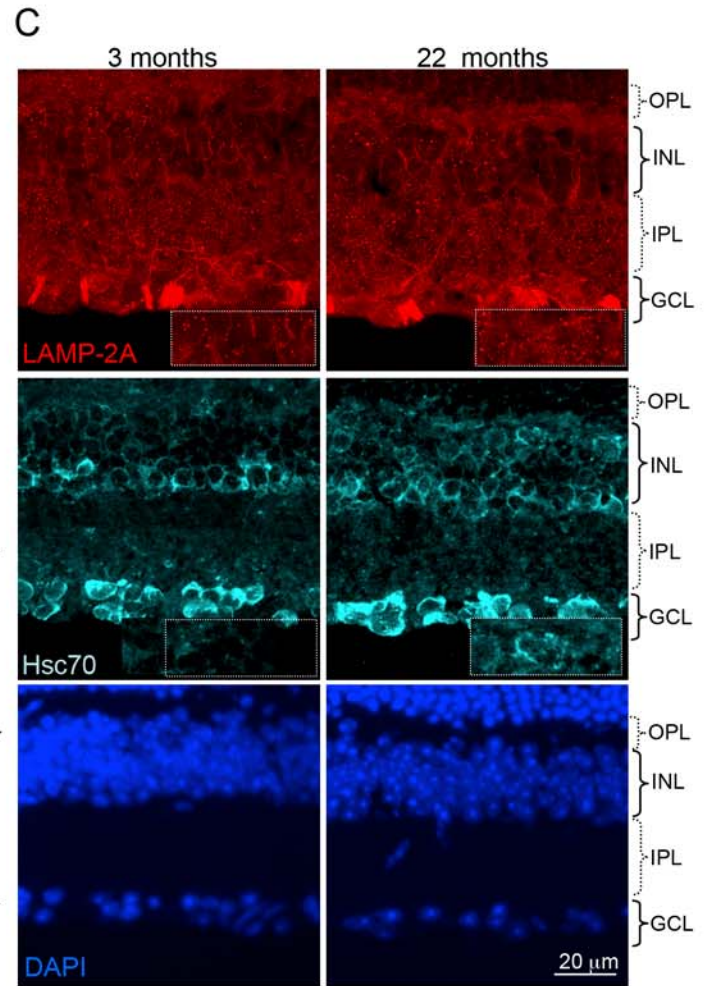

# Supplementary Figure 3

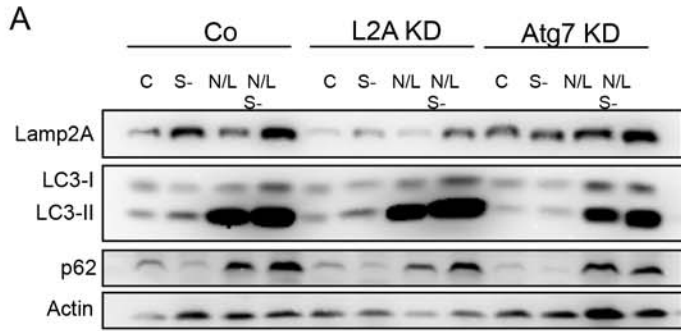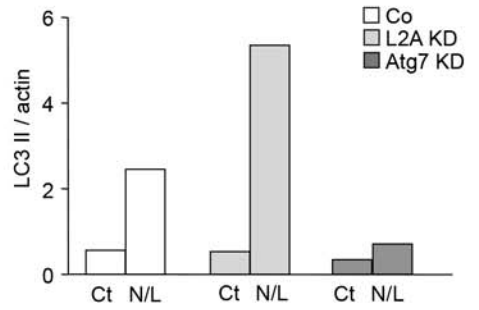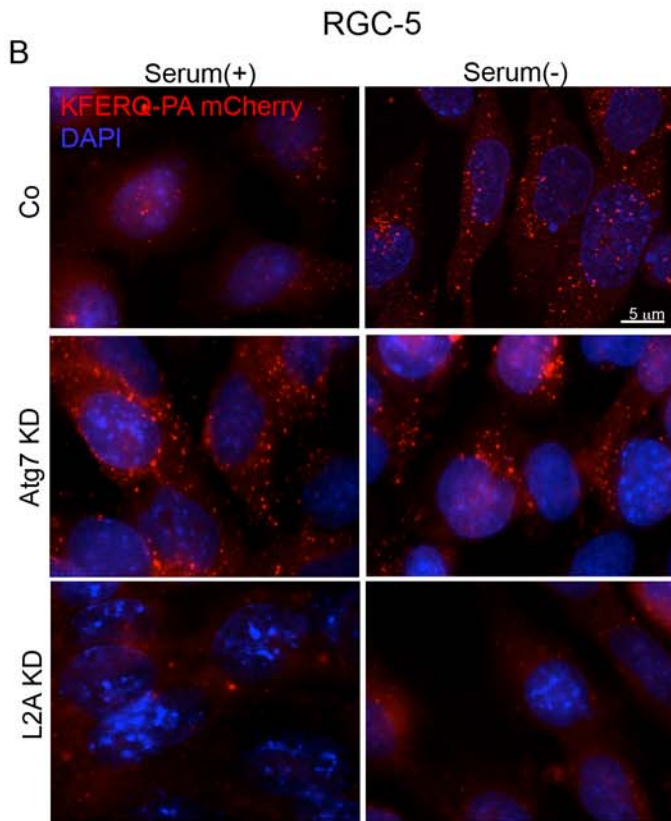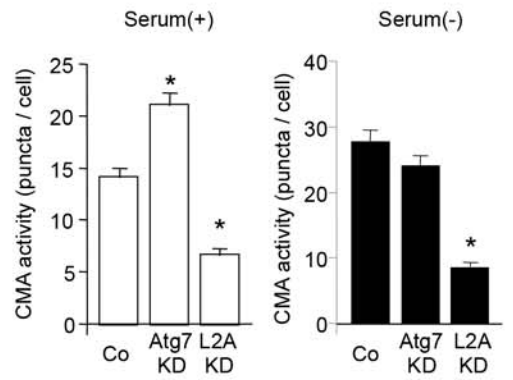

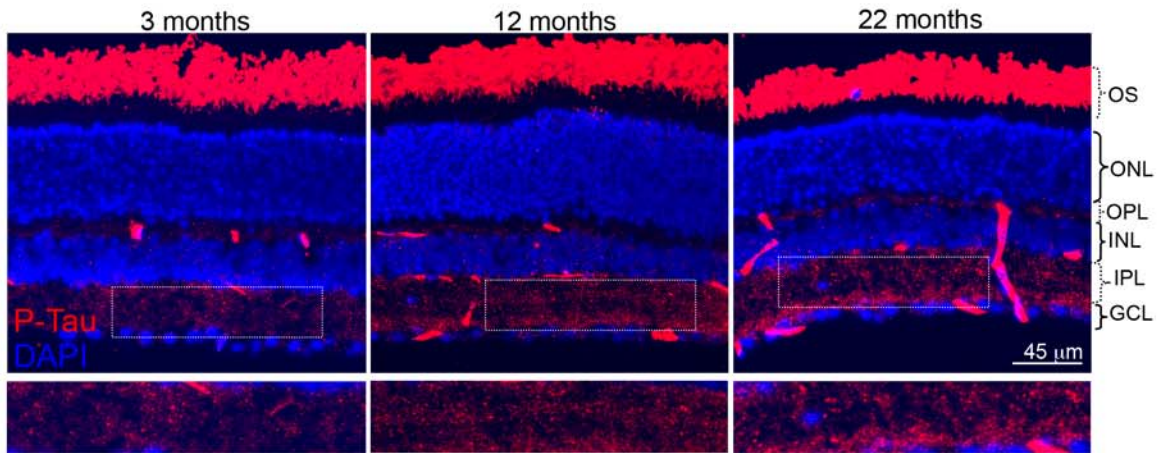

Supplement: NIHMS459040-supplement-Supp_Fig_S1-S4.pdf [file NIHMS459040-supplement-Supp_Fig_S1-S4.pdf]
